# Supplementary material
Source: PubMed Central journal article supplement (PMC1892922)
Supplement: pnas_0609410104_2.pdf [file pnas_0609410104_2.pdf]

**Table 4. M-FISH Analysis of metaphase chromosomes from WS cells**

## A. Effect of WRN Expression

## Experiment 1

| Cell line | Vector*           | Image no.**                        | Translocations                                              | Deletions                                  | Other |
|-----------|-------------------|------------------------------------|-------------------------------------------------------------|--------------------------------------------|-------|
| AG05229   | Control (29)      | No aberrations                     |                                                             |                                            |       |
| AG05229   | Control-E6E7 (23) | 1<br>6<br>13<br>14<br><br>16<br>18 | t(8;14) x1<br>t(12;12) x1<br><br>t(12;12) x1<br>1(16;22) x1 | del(8p) x1<br><br>del(2q) x1<br>del(8p) x1 |       |
| AG05229   | WRN (11)          | No aberrations                     |                                                             |                                            |       |
| AG05229   | WRN-E6E7 (26)     | 6<br>10<br>12                      | t(16;16) x1<br>t(12;19) x1                                  | del(12q) x1                                |       |

## Experiment 2

| Cell line | Vector            | Image no.                                        | Translocations                                                                              | Deletions                                                                                                            | Other |
|-----------|-------------------|--------------------------------------------------|---------------------------------------------------------------------------------------------|----------------------------------------------------------------------------------------------------------------------|-------|
| AG05229   | NI*** (20)        | 8<br>10                                          | t(10;16) x1                                                                                 | del(2p) x1<br>del(16p) x1                                                                                            |       |
| AG05229   | Control (9)       | No aberrations                                   |                                                                                             |                                                                                                                      |       |
| AG05229   | Control-E6E7 (26) | 5<br>6<br><br>13<br>19<br><br>21<br><br>23<br>24 | t(X;4) x1<br><br>t(12,12) x1<br>t(17;17) x1<br>t(17;17) x1<br><br>t(1;1) x1<br>1(21;4;8) x1 | del(4p) x1<br>del(4p) x1<br><br>del(1q) x1<br>del(3q) x1<br>del(6q) x1<br><br>del(1q) x1<br>del(4p) x1<br>del(5q) x1 |       |
| AG05229   | WRN-E6E7 (23)     | 7<br>16                                          | t(16;16) x1                                                                                 | del(12q) x1                                                                                                          |       |



| Cell line | Vector            | Image no.                                                                  | Translocations                                                                                                                                                                                      | Deletions                                                                            | Other   |
|-----------|-------------------|----------------------------------------------------------------------------|-----------------------------------------------------------------------------------------------------------------------------------------------------------------------------------------------------|--------------------------------------------------------------------------------------|---------|
| AG03141   | NI (19)           | 5<br>13                                                                    |                                                                                                                                                                                                     | del(4) x2<br>del(10q) x1                                                             |         |
| AG03141   | Control (20)      | 9<br><br><br><br><br><br>16                                                | t(1;12) x1<br>t(1;20) x1<br>t(4;18) x1<br>t(11;17) x1<br>t(12;19) x1<br>t(16;20) x1                                                                                                                 | del(2) x1<br>del(16p) x1<br>del(17p) x1<br>del(18) x1<br>del(19) x1<br><br>del(4) x1 |         |
| AG03141   | Control-E6E7 (30) | 2<br>3<br>4<br>7<br>8<br>9<br>13<br><br>18<br>21<br><br>24<br>26<br><br>27 | t(20;22) x1<br>t(9;9;19) x1<br><br>t(13;21) x1<br>t(13;22) x1<br>t(1;7) x1<br>t(9;20) x1<br>t(19;9;20) x1<br><br>t(18;19) x1<br>t(22;22) x1<br>t(5;19) x1<br>t(2;19) x2<br>t(3;22) x1<br>t(8;22) x1 | del(20) x1<br><br><br><br><br><br><br>del(11) x1<br><br><br>del(3) x1                |         |
| AG03141   | hTERT (30)        | 4<br>7<br>23                                                               | t(X;12) x1                                                                                                                                                                                          | del(12p) x1<br>del(9q) x1                                                            | 18 x3   |
| AG03141   | hTERT-E6E7 (15)   | 3                                                                          |                                                                                                                                                                                                     |                                                                                      | dup (3) |

\*Number of metaphases analyzed is indicated in brackets.

\*\*Each image represents a specific metaphase analyzed by M-FISH. The aberrant chromosomes of this image have been listed here.

\*\*\*Not infected
