# Supplementary material
Source: PubMed Central journal article supplement (PMC1892922)

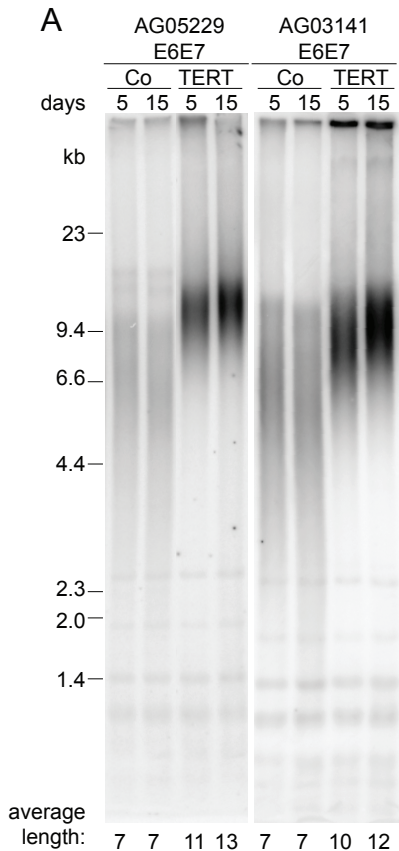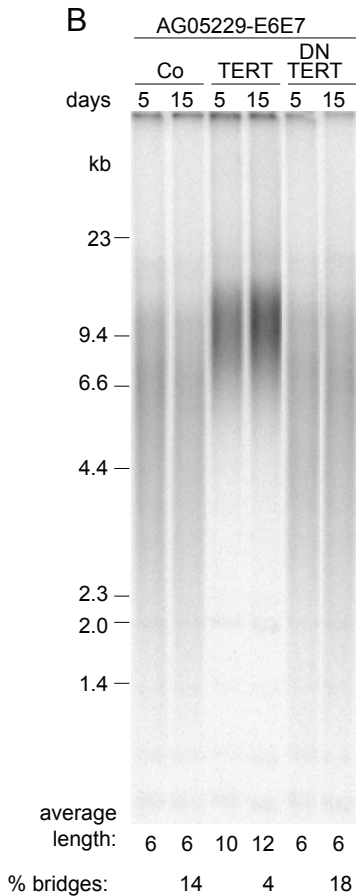

Supplement: pnas_0609410104_1.pdf [file pnas_0609410104_1.pdf]
